# Supplementary material for: Supramolecular self-assembly nature of a novel thermotropic liquid crystalline polymer containing no conventional mesogens
Source: Royal Society of Chemistry journal article supplement (doi:10.1039/b909914j), 2009-01-01
Supplement: b909914j.pdf [file b909914j.pdf]

*Supplementary Material*

**Supramolecular Self-Assembly Nature of a Novel Thermotropic Liquid Crystalline Polymer Containing No Conventional Mesogens**

**Shengtong Sun<sup>a</sup>, Hui Tang<sup>a</sup>, Peiyi Wu<sup>\*a</sup> and Xinhua Wan<sup>\*b</sup>**

*<sup>a</sup>The Key Laboratory of Molecular Engineering of Polymers, Ministry of Education, Department of Macromolecular Science and Advanced Materials Laboratory, Fudan University, Shanghai 200433, China.*

*E-mail: [peiyiwu@fudan.edu.cn](mailto:peiyiwu@fudan.edu.cn)*

*<sup>b</sup>College of Chemistry and Molecular Engineering, Peking University, Beijing 100871, China.*

## A Operation details of the sequence determination in the process of 2D $\Phi_H$ phase formation (70~110 °C)

**Step 1.** Signs of cross-peaks in asynchronous spectra (corresponding to Fig. 6b in the article)

|      |      |      |      |      |      |      |      |      |      |      |      |      |      |
|------|------|------|------|------|------|------|------|------|------|------|------|------|------|
| 1707 |      |      |      |      |      |      |      |      |      | -    | -    | -    |      |
| 1712 | -    | -    | -    |      | -    |      | -    | -    | +    | -    | -    |      |      |
| 1731 | -    | -    | +    |      | +    |      | +    | +    | +    | -    |      |      |      |
| 1741 |      |      |      |      |      |      |      |      |      |      |      |      |      |
| 2841 | +    |      | -    | -    | -    | -    | -    | -    |      |      |      |      |      |
| 2870 | -    |      | -    | -    | -    | -    | -    |      |      |      |      |      |      |
| 2898 | -    |      | +    | -    | +    |      |      |      |      |      |      |      |      |
| 2910 | -    |      | +    | -    | +    |      |      |      |      |      |      |      |      |
| 2930 | -    |      | +    | -    |      |      |      |      |      |      |      |      |      |
| 2940 | -    |      | +    |      |      |      |      |      |      |      |      |      |      |
| 2956 | -    |      |      |      |      |      |      |      |      |      |      |      |      |
| 2985 |      |      |      |      |      |      |      |      |      |      |      |      |      |
| 3041 |      |      |      |      |      |      |      |      |      |      |      |      |      |
|      | 3041 | 2985 | 2956 | 2940 | 2930 | 2910 | 2898 | 2870 | 2841 | 1741 | 1731 | 1712 | 1707 |

**Step 2.** Signs of cross-peaks in synchronous spectra (corresponding to Fig. 6a in the article)

|      |      |      |      |      |      |      |      |      |      |      |      |      |      |
|------|------|------|------|------|------|------|------|------|------|------|------|------|------|
| 1707 |      |      |      |      |      |      |      |      |      |      | -    | -    | +    |
| 1712 | -    | -    | +    |      | +    |      | +    | +    | +    | +    | -    | -    |      |
| 1731 | +    | +    | -    |      | -    |      | -    | -    | -    | -    | +    |      |      |
| 1741 |      |      |      |      |      |      |      |      |      |      |      |      |      |
| 2841 | -    |      | +    | +    | +    | +    | +    | +    |      |      |      |      |      |
| 2870 | -    |      | +    | +    | +    | +    | +    |      |      |      |      |      |      |
| 2898 | -    |      | +    | +    | +    |      |      |      |      |      |      |      |      |
| 2910 |      |      | +    | +    | +    |      |      |      |      |      |      |      |      |
| 2930 | -    |      | +    | +    |      |      |      |      |      |      |      |      |      |
| 2940 | -    |      | +    |      |      |      |      |      |      |      |      |      |      |
| 2956 | -    |      |      |      |      |      |      |      |      |      |      |      |      |
| 2985 |      |      |      |      |      |      |      |      |      |      |      |      |      |
| 3041 |      |      |      |      |      |      |      |      |      |      |      |      |      |
|      | 3041 | 2985 | 2956 | 2940 | 2930 | 2910 | 2898 | 2870 | 2841 | 1741 | 1731 | 1712 | 1707 |

**Step 3.** The final results of multiplication on the signs of each cross-peak in synchronous and asynchronous spectra.

|      |      |      |      |      |      |      |      |      |      |      |      |      |      |
|------|------|------|------|------|------|------|------|------|------|------|------|------|------|
| 1707 |      |      |      |      |      |      |      |      |      |      | +    | +    | -    |
| 1712 | +    | +    | -    |      | -    |      | -    | -    | +    | +    | +    |      |      |
| 1731 | -    | -    | -    |      | -    |      | -    | -    | -    | -    |      |      |      |
| 1741 |      |      |      |      |      |      |      |      |      |      |      |      |      |
| 2841 | -    |      | -    | -    | -    | -    | -    | -    |      |      |      |      |      |
| 2870 | +    |      | -    | -    | -    | -    | -    |      |      |      |      |      |      |
| 2898 | +    |      | +    | -    | +    |      |      |      |      |      |      |      |      |
| 2910 | +    |      | +    | -    | +    |      |      |      |      |      |      |      |      |
| 2930 | +    |      | +    | -    |      |      |      |      |      |      |      |      |      |
| 2940 | +    |      | +    |      |      |      |      |      |      |      |      |      |      |
| 2956 | +    |      |      |      |      |      |      |      |      |      |      |      |      |
| 2985 |      |      |      |      |      |      |      |      |      |      |      |      |      |
| 3041 |      |      |      |      |      |      |      |      |      |      |      |      |      |
|      | 3041 | 2985 | 2956 | 2940 | 2930 | 2910 | 2898 | 2870 | 2841 | 1741 | 1731 | 1712 | 1707 |

- The sequence can be obtained according to the method introduced above as follows (→ means earlier than): 1731  $\text{cm}^{-1}$  → 2841  $\text{cm}^{-1}$  → 3041, 2985  $\text{cm}^{-1}$  → 1712  $\text{cm}^{-1}$  → 2870  $\text{cm}^{-1}$  → 2956  $\text{cm}^{-1}$  → 2930  $\text{cm}^{-1}$  → 2898, 2910  $\text{cm}^{-1}$  → 2940  $\text{cm}^{-1}$ .

## B Operation details of the sequence determination between symmetric and asymmetric stretching vibrations of saturated C-H in the preparation process of 2D $\Phi_H$ phase (35~65 °C)

**Step 1.** Signs of cross-peaks in asynchronous spectra (corresponding to Fig. 7b)

|      |      |      |      |      |      |
|------|------|------|------|------|------|
| 2841 | +    | +    | +    | +    |      |
| 2870 | +    |      | +    |      |      |
| 2910 | +    | -    |      |      |      |
| 2930 | +    |      |      |      |      |
| 2956 |      |      |      |      |      |
|      | 2956 | 2930 | 2910 | 2870 | 2841 |

**Step 2.** Signs of cross-peaks in synchronous spectra (corresponding to Fig. 7a)

|      |      |      |      |      |      |
|------|------|------|------|------|------|
| 2841 | +    | +    | +    | +    |      |
| 2870 | +    |      | +    |      |      |
| 2910 | +    | +    |      |      |      |
| 2930 | +    |      |      |      |      |
| 2956 |      |      |      |      |      |
|      | 2956 | 2930 | 2910 | 2870 | 2841 |

**Step 3.** The final results of multiplication on the signs of each cross-peak in synchronous and asynchronous spectra.

|      |      |      |      |      |      |
|------|------|------|------|------|------|
| 2841 | +    | +    | +    | +    |      |
| 2870 | +    |      | +    |      |      |
| 2910 | +    | -    |      |      |      |
| 2930 | +    |      |      |      |      |
| 2956 |      |      |      |      |      |
|      | 2956 | 2930 | 2910 | 2870 | 2841 |

- The sequence can be obtained according to the method introduced above as follows ( $\rightarrow$  means earlier than):  $2956\text{ cm}^{-1} \rightarrow 2910\text{ cm}^{-1} \rightarrow 2870\text{ cm}^{-1}$ ,  $2930\text{ cm}^{-1} \rightarrow 2841\text{ cm}^{-1}$ .
